# Supplementary material for: CASSPER is a semantic segmentation-based particle picking algorithm for single-particle cryo-electron microscopy
Source: PubMed Central journal article supplement (PMC7884729; doi:10.1038/s42003-021-01721-1), 2021-02-15
Supplement: 42003_2021_1721_MOESM2_ESM.pdf [file 42003_2021_1721_MOESM2_ESM.pdf]

# **CASSPER is A Semantic Segmentation-based Particle Picking Algorithm for Single-Particle Cryo-Electron Microscopy**

Blesson George<sup>1,5,‡</sup>, Anshul Assaiya<sup>2,‡</sup>, Robin J. Roy<sup>1</sup>, Ajit Kembhavi<sup>3</sup>, Radha Chauhan<sup>4</sup>, Geetha Paul<sup>1</sup>, Janesh Kumar<sup>2,\*</sup>, Ninan S. Philip<sup>1,\*</sup>

<sup>1</sup>Artificial Intelligence Research and Intelligent Systems (airis4D), Thelliyoor - 689544, Kerala, India

<sup>2</sup>Laboratory of Membrane Protein Biology, National Centre for Cell Science, NCCS Complex, S. P. Pune University Campus, Ganeshkhind, Pune- 411 007, INDIA

<sup>3</sup>Inter-University Centre for Astronomy and Astrophysics (IUCAA), S. P. Pune University Campus, Ganeshkhind, Pune- 411 007, INDIA

<sup>4</sup>Laboratory of Structural Biology, National Centre for Cell Science, NCCS Complex, S. P. Pune University Campus, Ganeshkhind, Pune- 411 007, INDIA

<sup>5</sup>Department of Physics, CMS College, Kottayam - 686001, Kerala, INDIA

**‡ Equal contribution**

## **Supplementary Information**

### **\*Corresponding authors**

Ninan Sajeeth Philip PhD  
Dean and Director,  
Artificial Intelligence Research and Intelligent Systems ([airis4d.com](http://airis4d.com))  
Thelliyoor -689644  
Kerala, INDIA  
Email: [ninansajeethphilip@gmail.com](mailto:ninansajeethphilip@gmail.com)

Janesh Kumar, Ph.D.  
Scientist E,  
National Centre for Cell Science  
NCCS Complex, Pune University Campus  
Ganeshkhind, PUNE- 411 007, INDIA  
Email: [janesh@nccs.res.in](mailto:janesh@nccs.res.in)

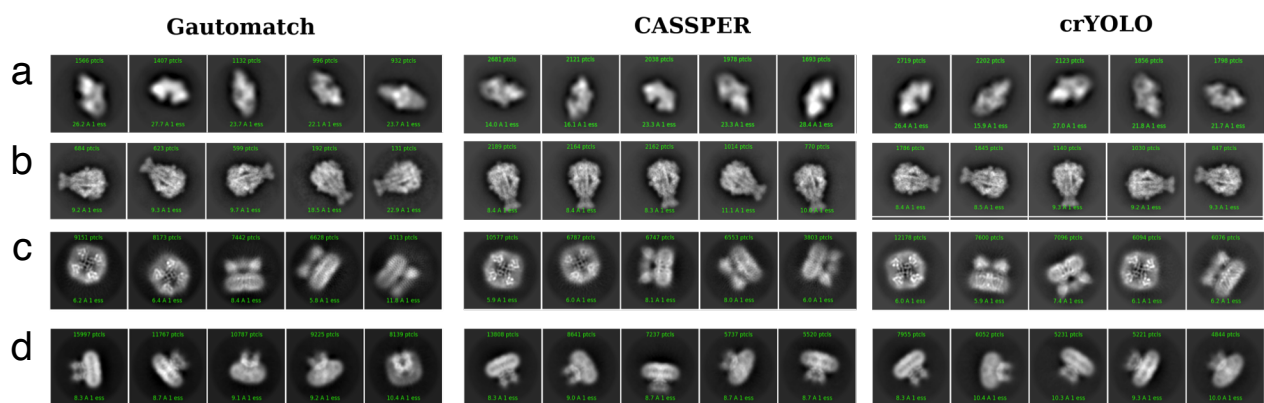

**Supplementary Figure 1. Comparison of Representative 2D class averages.** **a**  $\beta$ -galactosidase, **b** TcdA1, **c** TRPV1 and **d** HCN1 obtained after a single round of 2D classification in uniform pipeline using the particles picked by different tools.

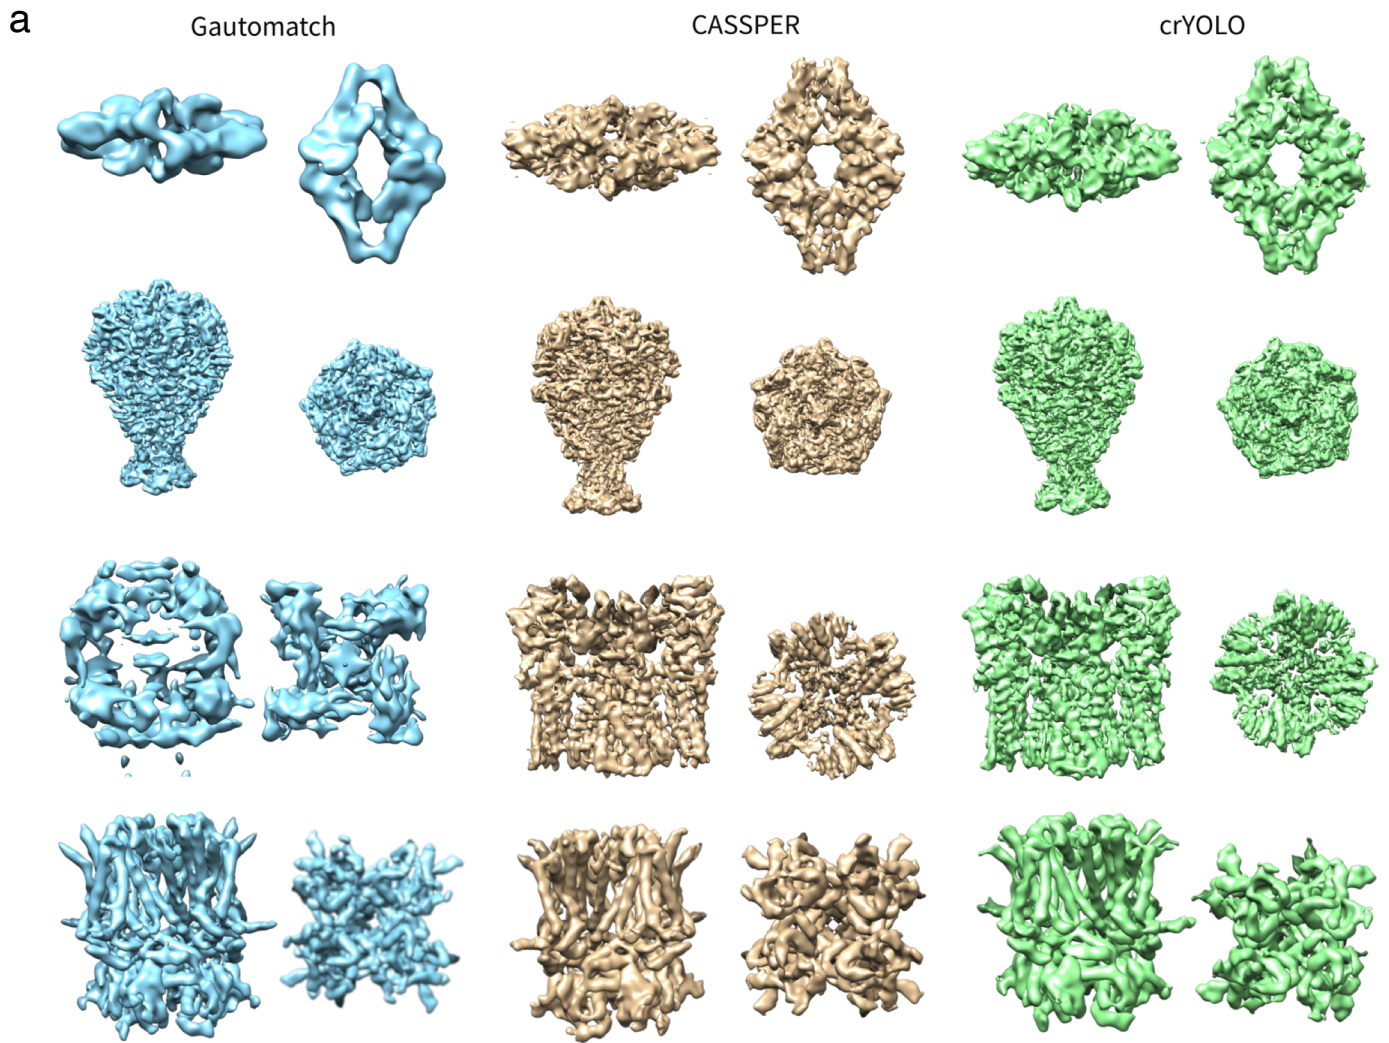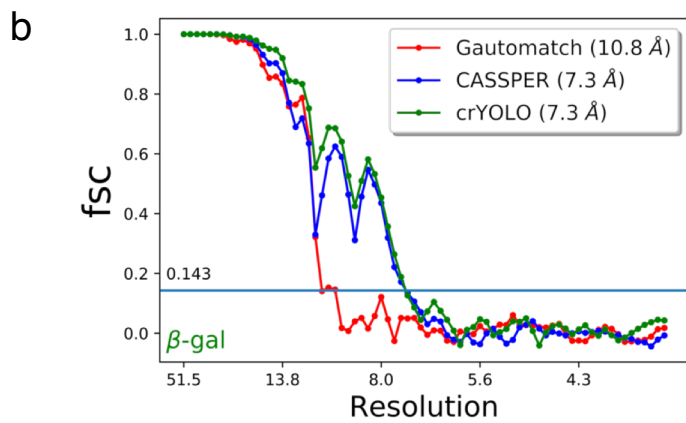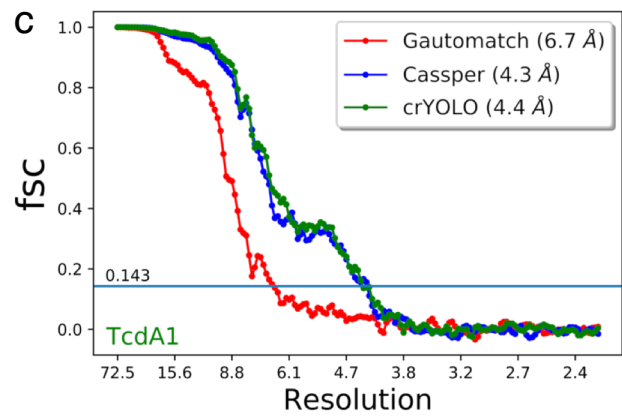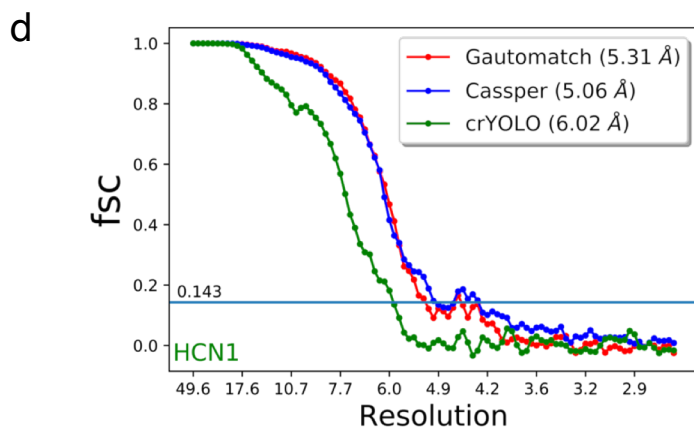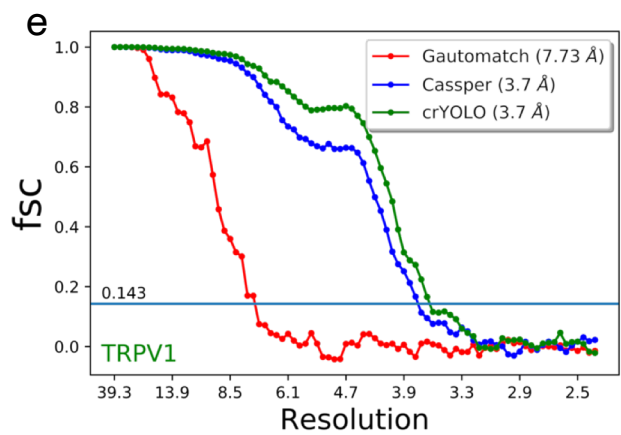

**Supplementary Figure 2. Evaluation of CASSPER using uniform pipeline.** Comparison of 3D models for  $\beta$ -galactosidase, TcdA1, TRPV1 and HCN1 generated using particles picked by Gautomatch (blue), CASSPER (tan), crYOLO (green). The particles were extracted in RELION2 and further processing was done using cryoSPARC v1 as per the uniform pipeline scheme. **a** Different views of the 3D models generated for  $\beta$ -galactosidase, TcdA1, TRPV1, and HCN1. FSC curves (tight mask) for the 3D reconstruction of  $\beta$ -galactosidase (**b**), TcdA1 (**c**), TRPV1 (**d**) and HCN1 (**e**) showing the resolution at the gold standard cut off (0.143) obtained using Gautomatch (red), CASSPER (blue) and crYOLO (green).

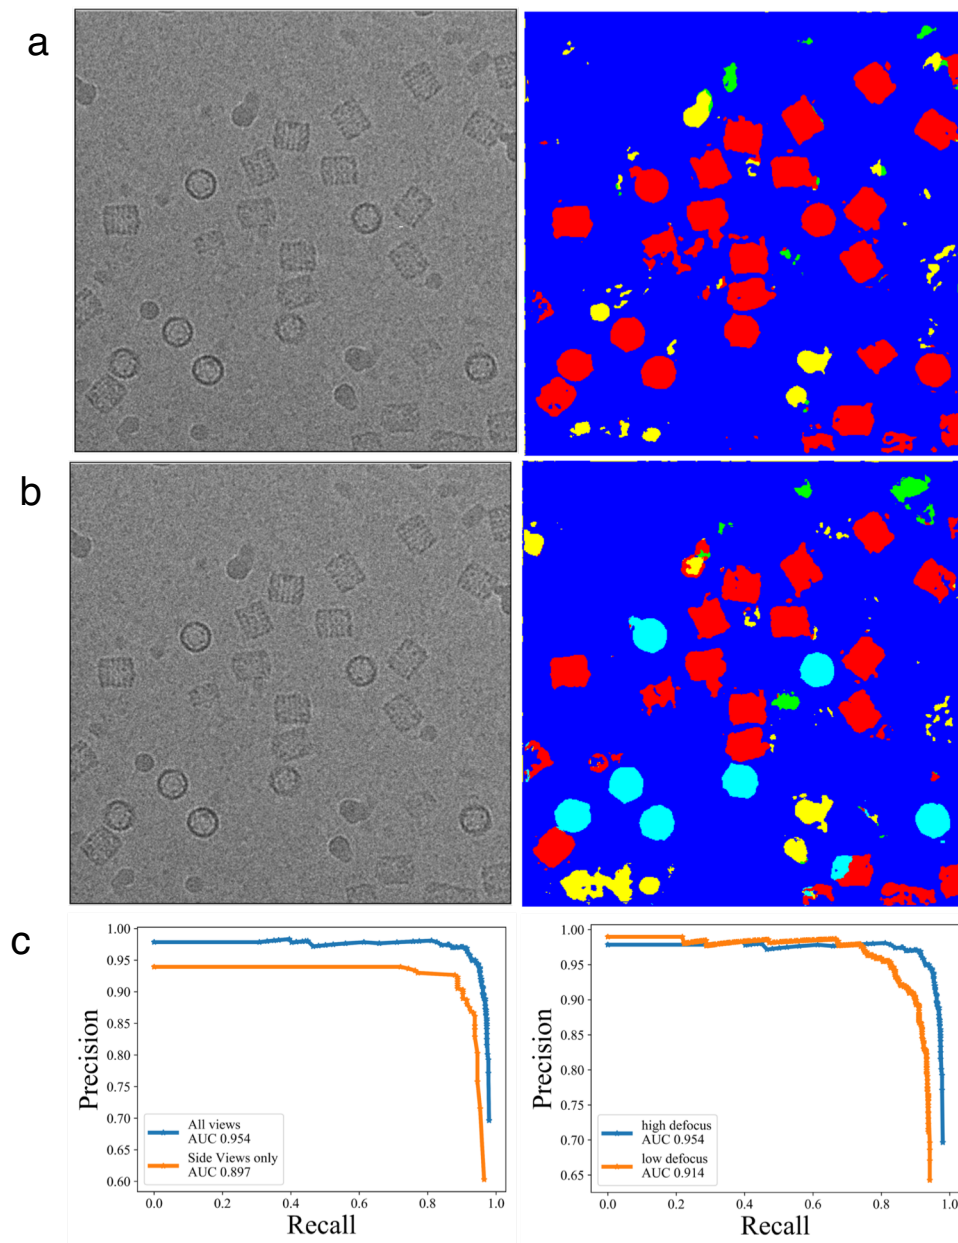

**Supplementary Figure 3. CASSPER benchmarking using KLH dataset.** Particles picked by CASSPER (a) all views (b) side views on representative micrograph of KLH and Precision recall curves. Pixels labelled in red, blue, green and yellow color correspond to protein, background, carbon edges and ice/liquid ethane respectively. c Precision recall curves for depicting performance of CASSPER for picking all views, only side views and for low and high defocus micrographs.

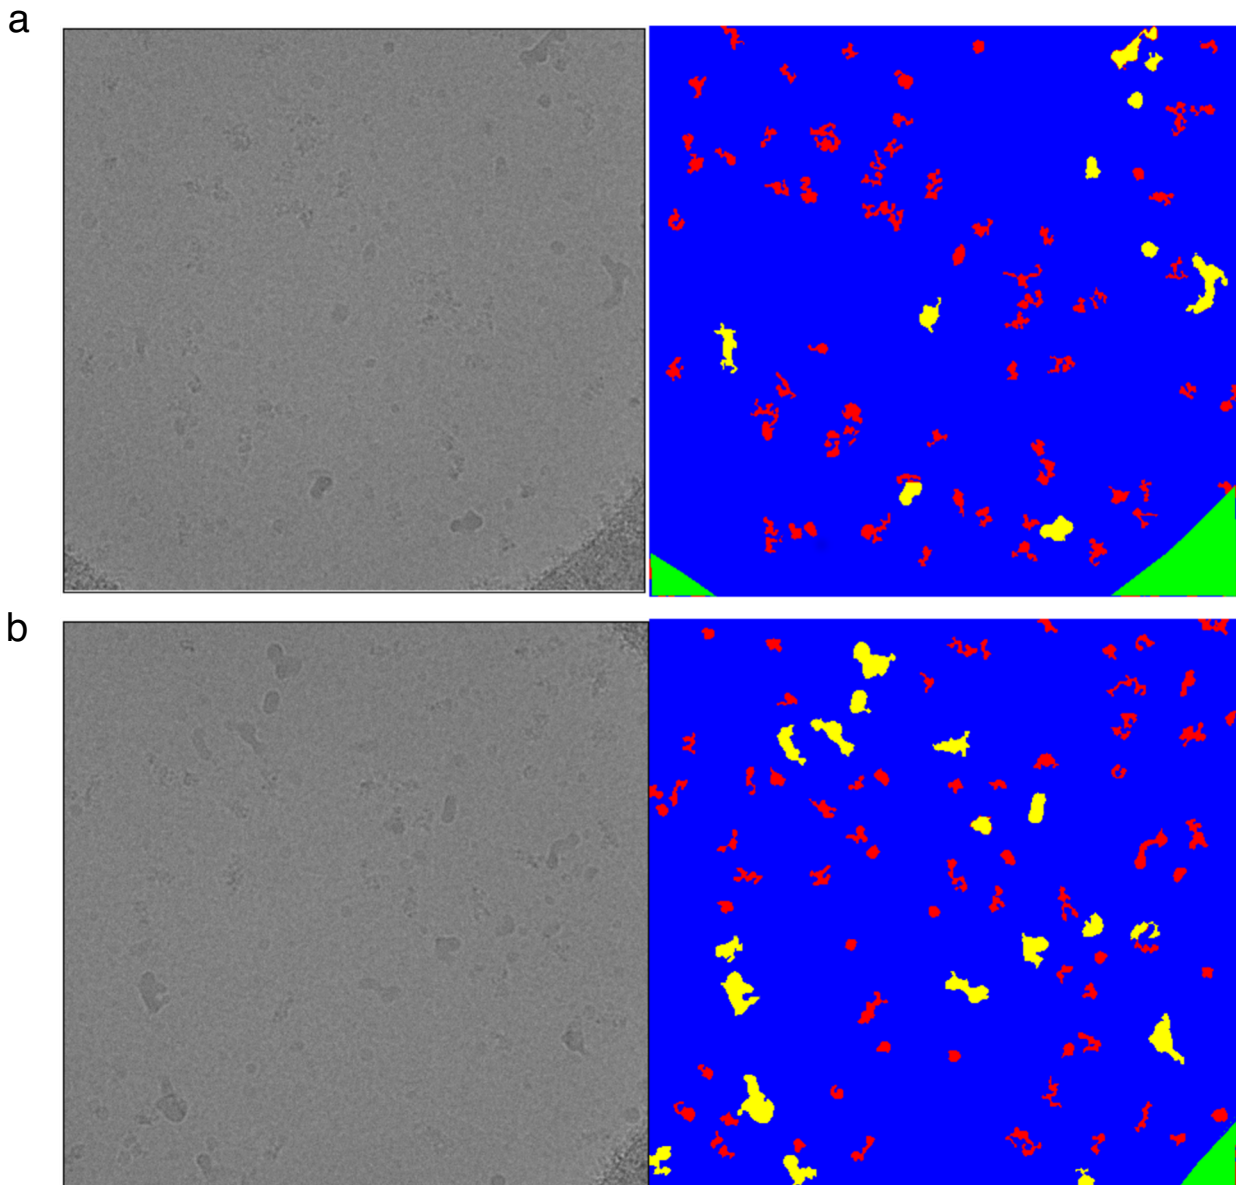

**Supplementary Figure 4. CASSPER performance on GluK3 receptor micrographs.** Representative micrographs of GluK3-kainate receptors (**a**) and (**b**) showing particles selected by CASSPER general model. Carbon edges are labelled in green, background in blue, ice in yellow and protein in red.

a

b

c

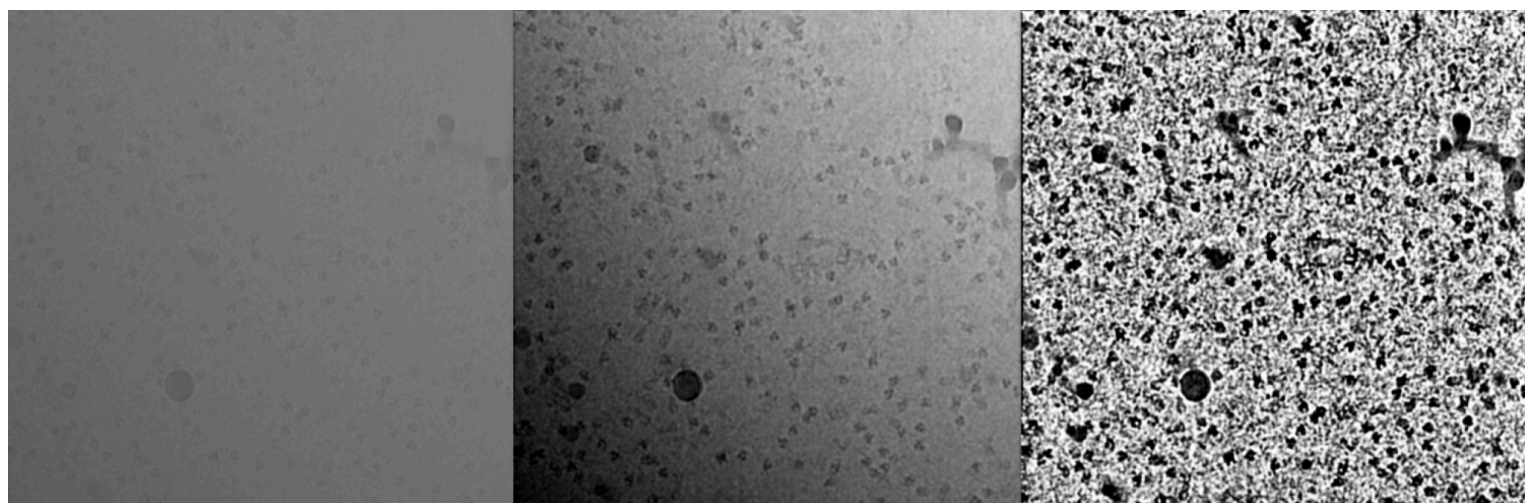

**Supplementary Figure 5. Effect of CLAHE.** **a** The raw micrograph, **b** The image is enhanced without applying CLAHE. The contrast difference at different regions of the image can be noted. **c** The image is enhanced after applying CLAHE. It can be observed that CLAHE has removed the contrast difference in the image.

**Supplementary Table 1.** Comparison of Gautomatch, CASSPER and crYOLO for  $\beta$ -galactosidase, TcdA1, TRPV1 and HCN1. The total number of particles picked by the respective tools were fed into the uniform pipeline scheme for further processing. The 2D class averages with characteristic features were selected and used for 3D reconstruction followed by homogeneous refinement for all proteins by imposing the respective symmetry. The resolutions obtained through a uniform pipeline scheme are given in the table.

| <b>Protein</b>                                   | <b>Method</b> | <b>No of particles picked</b> | <b>No of particles selected for 3D reconstruction</b> | <b>Resolution (Å)</b> |
|--------------------------------------------------|---------------|-------------------------------|-------------------------------------------------------|-----------------------|
| <b>TcdA1</b><br>EMPIAR<br>10089                  | GAUTOMATCH    | 4097                          | 3364                                                  | 6.7                   |
|                                                  | CASSPER       | 14603                         | 11245                                                 | <b>4.3</b>            |
|                                                  | crYOLO        | 11127                         | 10629                                                 | 4.4                   |
| <b><math>\beta</math>-gal</b><br>EMPIAR<br>10017 | GAUTOMATCH    | 25409                         | 21476                                                 | 10.8                  |
|                                                  | CASSPER       | 44261                         | 40467                                                 | <b>7.26</b>           |
|                                                  | crYOLO        | 44591                         | 42876                                                 | 7.32                  |
| <b>HCN1</b><br>EMPIAR<br>10081                   | GAUTOMATCH    | 195782                        | 107332                                                | 5.31                  |
|                                                  | CASSPER       | 150342                        | 115297                                                | <b>5.06</b>           |
|                                                  | crYOLO        | 141002                        | 103010                                                | 6.02                  |
| <b>TRPV1</b><br>EMPIAR<br>10005                  | GAUTOMATCH    | 127776                        | 38836                                                 | 7.73                  |
|                                                  | CASSPER       | 107320                        | 46913                                                 | 3.74                  |
|                                                  | crYOLO        | 110153                        | 67269                                                 | <b>3.68</b>           |



**Supplementary Table 2.** Precision recall curves showing the performance of CASSPER generalized model on KLH micrographs at high and low defocus values as per the bake off criterion.

| <b>Model trained using 17 high defocus micrographs</b> |            |                  |               |
|--------------------------------------------------------|------------|------------------|---------------|
| <b>Predicted for 15 micrographs</b>                    | <b>AUC</b> | <b>Precision</b> | <b>Recall</b> |
| High defocus                                           | 0.954      | 0.944            | 0.948         |
| Low defocus                                            | 0.92       | 0.90             | 0.898         |

**Supplementary Table 3:** List of datasets used for training general model of CASSPER

| <b>Sr. No.</b> | <b>EMPIAR ID</b>             | <b>Protein Name</b>                                                          |
|----------------|------------------------------|------------------------------------------------------------------------------|
| 1              | 10272                        | Horse spleen apoferritin                                                     |
| 2              | 10025                        | T20s Proteasome                                                              |
| 3              | 10096                        | Influenza Hemagglutinin Trimer                                               |
| 4              | 10175                        | Hemagglutinin                                                                |
| 5              | 10215                        | Rabbit muscle aldolase                                                       |
| 6              | 10217                        | Bovine liver glutamate dehydrogenase                                         |
| 7              | 10285                        | P-Rex-1-G-beta gamma signaling factor                                        |
| 8              | 10168                        | RNA Polymerase III                                                           |
| 9              | 10208                        | Mouse MDA5-dsRNA                                                             |
| 10             | 10081                        | (human HCN1 hyperpolarization-activated cyclic nucleotide-gated ion channel) |
| 11             | 10005                        | TRPV1                                                                        |
| 12             | 10099                        | Hrd1 and Hrd3 complex                                                        |
| 13             | JSB, Vol.145, pp. 3-14,2004) | KLH dataset                                                                  |

**Supplementary Table 4:** Comparison of processing speed tested on the same set of 15 micrographs each for TcdA1, TrpV1,  $\beta$ -gal and KLH using CASSPER, crYOLO and Topaz. Parameters such as downscaling factor, particle radius, and size of training dataset were kept uniform for each datasets when tested with different tools and the experiment was performed on the same desktop employing one GPU.

| <b>Protein</b>                | <b>CASSPER<br/>(seconds/mrc)</b> | <b>crYOLO<br/>(seconds/mrc)</b> | <b>Topaz<br/>(seconds/mrc)</b> |
|-------------------------------|----------------------------------|---------------------------------|--------------------------------|
| <b>TcdA1</b>                  | 1.92                             | 1.87                            | 1.87                           |
| <b>TRPV1</b>                  | 1.76                             | 2.23                            | 1.5                            |
| <b><math>\beta</math>-gal</b> | 1.8                              | 2.8                             | 1.89                           |
| <b>KLH</b>                    | 1.2                              | 1.66                            | 0.85                           |
