# Supplementary material for: CASSPER is a semantic segmentation-based particle picking algorithm for single-particle cryo-electron microscopy
Source: PubMed Central journal article supplement (PMC7884729; doi:10.1038/s42003-021-01721-1), 2021-02-15
Supplement: 42003_2021_1721_MOESM3_ESM.pdf [file 42003_2021_1721_MOESM3_ESM.pdf]

## Description of Additional Supplementary Files

**File name:** Supplementary Data 1

**Description:** Source data underlying plots shown in figures.
